# Supplementary material
Source: PubMed Central journal article supplement (PMC2599841)
Supplement: 108.135251_1.pdf [file 108.135251_1.pdf]

```

;+
; NAME:
;       DEMO
;
;
; AUTHORS:
; Cherrie Kong & Mark B. Cannell.
; Dept. Physiology, University of Auckland, New Zealand.
;
; DESCRIPTION:
; This routine demonstrates how to use the MFDA and accessory routines to detect Ca2+ sparks in experimental datasets.
; This demonstration is intended for line-scanned laser-scanning confocal images, with x-t oriented to x-y
; respectively and in TIFF format. Use of other formats require the use of the appropriate read routines.
; The orientation of images is important as the supplied model is oriented in that direction.
; A simple normalization of the data is carried out by DEMO_NORMALIZER which simply averages all lines as
; representative of the background. The user is strongly urged to think about what is appropriate normalization!
; In this demonstration the data is broken into 2048-line chunks. This is not needed for the MFDA per se but simply
; because it is likely the background will change after so many line scans. If the background changes significantly,
; a warning is printed -please do not simply ignore this warning -something was happening during the experiment...
; (Normalization provided by the user usually involves selecting a non-spark region to be used to create the average array
; required and users can supply their own normalized datasets and models in the MFDA by directly using the FINDOBJECT
; routine below.) This routine WILL NOT re-enter with a revised model and repeat the fit
; -it's only a demonstration of the calling procedures!
;
; CALLING SEQUENCE:
; DEMO [,NORMDAT,MODEL,RESULTS,REFINED]
;
; INPUTS:
; The user will be prompted for filename and model parameters.
;
; OUTPUTS:
; All outputs are optional and allow the user to use these elements as required:
;
;       NORMDAT:      normalized data array
;       MODEL:        original model that the user created
;       RESULTS:      array holding results of the MFDA. Each line gives 3 values:
;                   [0]:    p-value associated with detected location
;                   [1]:    x-ordinate of detected location
;                   [2]:    y-ordinate of detected location
;       REFINED:      refined model based on curve-fitting to an average of the detected events
;
; COPYRIGHT:The IDL codes and algorithms in this program are to be used for
; non-commerical purposes only. For commerical use, contact the authors.
;-

```

```

FORWARD_FUNCTION DEMO_READER, DEMO_CELLNONCELL, KERNELSIZE, DEMO_NORMALIZER
PRO DEMO, normdat, model, results, refined
!EXCEPT = 0 ;kill a bug in Windows implementation of IDL

```

```

;INTRODUCTION
PRINT, ''
PRINT, ':::MFDA DEMONSTRATION:::'
PRINT, ''
PRINT, 'This is a demonstration of the Matched Filter Detection Algorithm (MFDA) and is intended for '
PRINT, 'line-scanned laser-scanning confocal images (x-t) in TIFF format. x-t orientation must '
PRINT, 'correspond with x-y, respectively, as per standard definition. '
PRINT, 'Proceed? Y/N ' & proceed = STRUPCASE(GET_KBRD()) ;ask user if they wish to proceed

```

```

IF (proceed EQ 'Y') THEN BEGIN
;READ IN DATA & DISPLAY
PRINT, '' & PRINT, ':::STEP 1: READ IN DATA... '

filename = '' ;data file
WHILE (filename EQ '') DO BEGIN ;query user until appropriate filepath and name entered
PRINT, 'Please type in full TIFF filepath and name (e.g. C:\images\data.tif) '
READ, filename
query = QUERY_TIFF(filename) ;check file exists and is in TIFF format
IF (query EQ 0) THEN BEGIN ;if query unsuccessful
filename = ''
PRINT, 'Bad filename. Please try again.'
ENDIF ELSE BEGIN
data = READ_TIFF(filename) ;read in TIFF
szda = SIZE(data);find size of DATA
IF (szda[0] NE 2) THEN BEGIN ;must be 2D array

```

```

        PRINT,'Data is not a 2D array. Do you want to read another file?' & proceed = STRUPCASE(GET_KBRD())
        IF (proceed EQ 'Y') THEN filename = '' ELSE RETURN
    ENDF ELSE BEGIN
    IF (szda[4] LT 10000) THEN BEGIN ;DATA must have > 10000 pixels
        PRINT,'Dataset is too small. Do you want to try again?' & proceed = STRUPCASE(GET_KBRD())
        IF (proceed EQ 'Y') THEN filename = '' ELSE RETURN
    ENDF
    ENDELSE
ENDWHILE

IF (szda[1] LT 256) THEN zoom = 256/szda[1] ELSE zoom = 1 ;zoom up to show pixels
SLIDE_IMAGE,BYTSCL(REBIN(data,szda[1]*zoom,szda[2]*zoom,/SAMPLE)),XVISIBLE=256,YVISIBLE=256,TITLE='Data' ;display DATA in window

;ASK FOR PARAMETERS AND CREATE MODEL
PRINT,' ' & PRINT,':::STEP 2: CREATE A MODEL... '

peak = 1. & PRINT,'What is its peak change in fluorescence (dF; e.g. 1)? ' & READ,peak
bkgd = 1. & PRINT,'What is its basal fluorescence (F0; e.g. 1.0)? ' & READ,bkgd
fwhm = 5. & PRINT,'What is its FWHM (e.g. 5 px)? ' & READ,fwhm
rise = 1.8 & PRINT,'What is its rise time (e.g. 1.8 px)? ' & READ,rise
decay = 28. & PRINT,'What is its decay time (e.g. 28 px)? ' & READ,decay

model = FLTARR(256,256) ;create MODEL array
params = [peak,fwhm,rise,decay,128,128,bkgd] ;model parameters with centered spark
MAKESPARK_FUNC,model,params ;create MODEL spark
WINDOW,xsize=256*zoom,ysize=256*zoom,title='Model' ;open new window

TVSCL,REBIN(model,256*zoom,256*zoom,/SAMPLE) ;display MODEL in new window with same zoom as DATA

;SEARCH FOR MODEL OBJECT IN DATASET USING THE MFDA
PRINT,' ' & PRINT,':::STEP 3: EMPLOY MATCHED FILTER DETECTION ALGORITHM (sigp = 0.001)...'
sigp = 0.001 ;assign value of SIGP
;if SZDA[2]>1024 lines, then DATA will be segmented for analysis
settings = KERNELSIZE(data,model) ;find overlap region of segments based on border region required for FINDOBJECT
y_bord = settings[1] + settings[3];overlap region stored in Y_BORD
normdat = FLTARR(szda[1],szda[2]) ;empty array to store normalized segments in DATA coordinates (for viewing purposes)

nseg = (szda[2] / 1024) > 1
print,nseg
linestodo = szda[2] / nseg

FOR segment=0,nseg-1 DO BEGIN
    endl = (segment+1)*linestodo
    IF (segment GT 0) THEN start = segment * linestodo - 2 * y_bord ELSE start = 0
    datn = data[* ,start:endl-1]
    datn = DEMO_NORMALIZER(datn) ;normalize segment
    szdatn = SIZE(datn) ;size of segment
    normdat[* ,start:endl-1] = datn ;fill NORMDAT

;MFDA DETECTION
FINDOBJECT,datn,model,sigp,resultsn,detectn,settings ;MFDA
IF (segment EQ 0) THEN BEGIN ;create/fill detect and results arrays for first segment
    print,detectn
    detected = detectn
    results = resultsn
ENDIF ELSE BEGIN ;for second plus segments
    resultsn[2,*] += start ;adjust detected y-ordinates to full data grid from segment grid
    results = [[results],[resultsn]]
    detected += detectn
ENDELSE
ENDFOR

;PRINT RESULTS
PRINT,STRING(13B),'Total number of detected events: ',detected
PRINT,'Print full results? Y/N ' & proceed = STRUPCASE(GET_KBRD())
IF (proceed EQ 'Y') THEN PRINT,' P-value | X-ordinate | Y-ordinate ',STRING(13B),results
PRINT,'Show detected locations on image? Y/N ' & proceed = STRUPCASE(GET_KBRD())
IF (proceed EQ 'Y') THEN BEGIN
    vrtbd = settings[3]-1 & hrtbd = settings[2]-1 ;create array that shows border region of no detection
    fdata = normdat ;copy of normdat
    fdata[hrtbd-1:hrtbd,vrtbd:szda[2]-vrtbd] = 0 ;left border

```

```

fdata[szda[1]-hrtbd-1:szda[1]-hrtbd,vrtbd:szda[2]-vrtbd] = 0 ;right border
fdata[hrtbd:szda[1]-hrtbd,vrtbd-1:vrtbd] = 0 ;top border
fdata[hrtbd:szda[1]-hrtbd,szda[2]-vrtbd-1:szda[2]-vrtbd] = 0 ;bottom border
SLIDE_IMAGE,BYTSCL(fdata),SLIDE_WINDOW=resim,XVISIBLE=256,YVISIBLE=256,TITLE='MFDA: Detected Locations'
WSET,resim ;display NORMDAT with detected events
FOR i=0,detected-1 DO ARROW,results[1,i],results[2,i]-10,results[1,i],results[2,i],THICK=2

```

```
ENDIF
```

```
;ANALYZE RESULTS BY FITTING AVERAGE
```

```
IF (detected GT 0) THEN BEGIN
;only give this option if there are detected events!
PRINT,' ' & PRINT,':::(Optional) Step 4: parameter fitting of the average detected event...'
PRINT,'Fit detected events by least-squared method to normalized data? Y/N ' & proceed = STRUPCASE(GET_KBRD())

```

```
IF (proceed EQ 'Y') THEN BEGIN
```

```

initp = [params[0],params[1],params[3]] ;initial parameters for fit based on parameters given for the search object (model)
ANALYZESPARK,normdat,results,detected,initp,parmfir,refined,chi ;least-squares fit routine
IF (chi EQ 0) THEN BEGIN ;if fit was successful then print parameters
PRINT,'Least-squares fit was successful. The fitted parameters are: '
PRINT,'dF: ',parmfir[0]
PRINT,'F0 (basal fluorescence): ',parmfir[6]
PRINT,'FWHM: ',parmfir[1],' px'
PRINT,'rise time constant: ',parmfir[2],' px'
PRINT,'decay time constant: ',parmfir[3],' px'
WINDOW,xs=512,ys=512,title='Refined Model'
TVSCL,refined[(szda[1]/2-256)>0:(szda[1]/2+255)<(szda[1]-1),(szda[2]/2-256)>0:(szda[2]/2+255)<(szda[2]-1)]
ENDIF ELSE PRINT,'Least-squares fit was unsuccessful. Try changing the initial parameters.' ;if fit not successful

```

```
ENDIF
```

```
ENDIF
```

```
ENDIF ELSE PRINT,'No selected: MFDA demonstration not initiated.'
```

```
PRINT,''
```

```
PRINT,':::END OF MFDA DEMONSTRATION:::'
```

```
END
```

```

;+
; NAME: DEMO_NORMALIZER
; PURPOSE: This routine is used by DEMO and aids the user in normalizing a line-scanned

```

```

; laser-scanning confocal image prior to its use in the MFDA. It subtracts the mean of the data and then
; scales the data. For many experiments this is not the best estimate of background or way to normalize the
; data, the user should modify this routine as appropriate.

```

```

; INPUT: data: 2D data array
; OUTPUT: data: normalized 2D data array
; COPYRIGHT: The IDL6.3 codes and algorithms in this program are to be used for
; non-commercial purposes only. For commercial use, contact the authors.
;-

```

```
FUNCTION DEMO_NORMALIZER,data
```

```

szda = SIZE(data)
normdat = data
offset = MIN(data) - 1.0 ;estimate offset of image
normdat = data - FLOAT(offset) ;remove offset
avglines = REBIN(normdat,szda[1],1) ;average of all lines
avg = FLOAT(REBIN(avglines,szda[1],szda[2])) ;resize average array to data size for division
normdat = normdat/FLOAT(avg) ;normalize
RETURN,normdat

```

```
END
```

```

;+
; NAME: FINDOBJECT
; PURPOSE: This routine computes the MFDA: it detects objects against a model object defined by
; the user. It returns a -log(P-value) map, P-values and coordinates
; of local P-value minima for detected Ca2+ spark events.
; INPUTS: data: 2D array containing search space, usually normalized data
; model: object to be detected, usually a synthetic Ca2+ spark
; sigp: significant P-value level
; OUTPUTS: results: array holding output of MFDA, with length of second dimension equal to number
; of detected events (unless no sparks are detected)

```

```
[0]: pvalue
```

```

;           [1]: x-ordinate
;           [2]: y-ordinate
; detected:number of detected events
; settings:settings calculated for MFDA
;           [0]: shar[0]
;           [1]: shar[1]
;           [2]: area[0]
;           [3]: area[1]
; COPYRIGHT:The IDL6.3 codes and algorithms in this program are to be used for
;           non-commerical purposes only. For commerical use, contact the authors.
;-

FORWARD_FUNCTION FFTCORREL,RSTOP_CALC,CORREL_FIND,STATMAP,NEXTSP,KERNELSIZE
PRO FINDOBJECT,data,model,sigp,results,detected,settings
!EXCEPT = 0 ;kill a bug in Windows implementation of IDL
ON_ERROR,1

;NON-STATIONARY BEHAVIOR CHECK & WARNING
  DEMO_NONSTATWARNING,data

;CREATE INTERMEDIATE & FINAL RESULTS ARRAYS FOR MFDA
  szda = SIZE(data) ;dimensions of DATA
  smo = SIZE(model);dimensions of MODEL
  results = FLTARR(3)

;FFT CORRELATION & FIND RSTOP (GIVEN USER-DEFINED SIGP)
  correl = FFTCORREL(data,model) ;initital cross-correlation to find
  rstop = RSTOP_CALC(data,model,correl) ;calculate rstop

;FIND APPROPRIATE KERNEL SIZE
  settings = KERNELSIZE(data,model)
  shar = settings[0:1]
  area = settings[2:3]

;SPEARMAN RANK CORRELATION
  detected = 0 ;initiate detection count
WHILE (MAX(correl) GT rstop) DO BEGIN ;begin detection
  pre = CORREL_FIND(correl,area,shar) ;find tentative spark locations
  res = STATMAP(data,model,area,shar,sigp,pre) ;non-parametric correlation
  IF (res[0] LE sigp) THEN BEGIN ;if P-value < SIGP
    IF (detected EQ 0) THEN results = res ELSE results = [[results],[res]] ;fill results array
    detected += 1 ;increase detection count
  ENDIF ;empty array for output in stand-alone program
  correl = NEXTSP(correl,model,pre,area) ;remove detected event from FFT correlation array
ENDWHILE
END

;+
; NAME: DEMO_NONSTATWARNING
; PURPOSE: This routine is used by DEMO and warns the user of
;           non-stationary behavior that may affect MFDA performance. The routine averages
;           line-scan data in the x-dimension to produce the time-dependent average signal.
;           This signal is then reversed in time and compared to itself and R computed. A cut-off
;           of 0.2 is used to detect weak trends in the data. YMMV.
; INPUT: data : 2D data array
; OUTPUT: status : 0 = non-stationary behavior not detected
;           1 = non-stationary behavior detected and warning is printed
; COPYRIGHT:The IDL6.3 codes and algorithms in this program are to be used for
;           non-commerical purposes only. For commerical use, contact the authors.
;-

PRO DEMO_NONSTATWARNING,data,status
  szda = SIZE(data)
  timeavg = REFORM(REBIN(FLOAT(data),1,szda[2]))
  result = CORRELATE(timeavg,REVERSE(timeavg))
  IF (ABS(result) GT 0.2) THEN BEGIN
    PRINT,'Warning: Non-stationary behavior detected! '
    status = 1
  ENDIF ELSE status = 0
END

```

```

;+
; NAME: FFTCORREL
; PURPOSE: This routine correlates two datasets by FFT
; INPUTS: imA: data to be convolved
;          imB: second dataset or 'PSF' (centred and enlarged)
; KEYWORDS: AUTO: computes auto-correlation of A
; REFERENCE: This IDL6.3 routine has been modified from CONVOLVE, originally written by
;            Frank Varosi, NASA/GSFC 1992.
;-

```

```

FUNCTION FFTCORREL, imA, imB, AUTO=auto
  A = imA - MEAN(imA)           ;mean subtraction to relate to Pearson's
  sza = SIZE(A)                 ;dimensions of A
  sc = sza/2
  na = N_ELEMENTS(A)
  aFT = FFT(A, -1) ;FFT of A
IF KEYWORD_SET(auto) THEN BEGIN
  acor = SHIFT(na*REAL_PART(FFT(aFT*CONJ(aFT), 1)), sc[1], sc[2]) ;autocorrelation of A
  normsiga = (na-1) * VARIANCE(A)
  acor = acor / FLOAT(normsiga) ;normalization to relate to Pearson's
  RETURN, acor
ENDIF ELSE BEGIN
  szb = SIZE(imB)
  B = imB - MEAN(imB)           ;mean subtraction to relate to Pearson's
  psf = (sc - szb/2) > 0        ;center B in new array
  s = (szb/2 - sc) > 0          ;scaling of B
  s2 = (s + sza-1) < (szb-1)
  bFT = CONJ(A)*0
  bFT[psf[1], psf[2]] = B[s[1]:s2[1], s[2]:s2[2]]
  bFT = FFT(bft, -1, /OVERWRITE)
  cor = na * REAL_PART(FFT(aFT * CONJ(bFT), 1)) ;cross-correlation
  sc = sc + (sza MOD 2)
  cor = SHIFT(cor, sc[1], sc[2]) ;return to correct position
  normsig = (na-1) * STDEV(A) * STDEV(B)
  cor = cor / FLOAT(normsig) ;normalization to relate to Pearson's
  RETURN, cor
ENDELSE
END

```

```

;+
; NAME: RSTOP_CALC
; PURPOSE: This routine calculates the appropriate value of RSTOP by correlating scrambled data with
;          the model to find an upper-bound for correlation values obtained with noise of the same
;          energy as the normalized data itself.
; INPUTS: data: 2D array holding dataset
;          model: 2D array holding model object
;          correl: 2D array holding the correlation between data and model (given by FFTCORREL)
; OUTPUTS: rstop: the appropriate value for RSTOP
; COPYRIGHT: The IDL6.3 codes and algorithms in this program are to be used for
;            non-commercial purposes only. For commercial use, contact the authors.
;-

```

```

FUNCTION RSTOP_CALC, data, model, correl
  szda = SIZE(data); find size of data array
  noise_est = REFORM(data(SORT(RANDOMU(seed, szda[4])), szda[1], szda[2]))
  cor_noise = FFTCORREL(noise_est, model) ;cross-correlate noise with model
  RETURN, MEAN(cor_noise) + 6.0 * STDEV(cor_noise) ;six standard deviations from mean correlation
END

```

```

;+
; NAME: KERNELSIZE
; PURPOSE: This routine finds the appropriate kernel size to use in STATMAP
; INPUTS: data: 2D array holding dataset
;          model: 2D array holding model object
; OUTPUTS: shar: half of shift area for centre of model object
;           [0]: x-dimension
;           [1]: y-dimension

```

```

;          area:    2-element array defining kernel size for Spearman Rank Correlation
;                  [0]: half WINA in x-dimension
;                  [1]: half WINA in y-dimension
; COPYRIGHT:The IDL6.3 codes and algorithms in this program are to be used for
;                  non-commercial purposes only. For commercial use, contact the authors.
;-

```

```

FUNCTION KERNELSIZE,data,model
  szda = SIZE(data);find size of data
  smo = SIZE(model);find size of model
  shar = [5,5]          ;half shift area to test for most likely spark location
  peakloc = ARRAY_INDICES(model,WHERE(model EQ MAX(model))) ;find location of peak
  halfflu = ((MAX(model)-MIN(model))/2.+MIN(model)) ;half-max fluorescence value
  fwhm = N_ELEMENTS(WHERE(model[*],peakloc[1]) GT halfflu);find FWHM
  fdhm = N_ELEMENTS(WHERE(model[peakloc[0],*] GT halfflu));find full-duration half maximum (FDHM)
  area = [1.5*fwhm,1.5*fdhm]          ;kernel size is 3 times FWHM in x and 3 times FWHM in y
  ulimx = ROUND((szda[1] - 2 * shar[0]) / 8 - 0.5);kernel cannot be larger than one quarter data size (minus shift region)
  ulimy = ROUND((szda[2] - 2 * shar[1]) / 8 - 0.5)
  llimx = 5          ;kernel should not be smaller than that which gives enough pixels for
  llimy = 5          ;Student's t distribution approximation (Spearman Rank Correlation test)
IF (area[0] GE ulimx) THEN area[0] = ulimx - 1
IF (area[0] LE llimx) THEN area[0] = llimx
IF (area[1] GE ulimy) THEN area[1] = ulimy - 1
IF (area[1] LE llimy) THEN area[1] = llimx
  RETURN,[shar,area]
END

```

```

;+
; NAME:          CORREL_FIND
; PURPOSE:       This routine finds the first maximum cross-correlation coefficient and
;                returns its x,y coordinates on the original data grid
; INPUTS:        correl:  2D array holding R of data cross-correlated with model
;                area:   defines kernel size for Spearman Rank Correlation
;                  [0]: half WINA in x-dimension
;                  [1]: half WINA in y-dimension
;                shar:  half of shift area for centre of model object
;                  [0]: x-dimension
;                  [1]: y-dimension
; OUTPUTS:       pre:    tentative location for detected Ca2+ spark
;                  [0]: tentative x-ordinate
;                  [1]: tentative y-ordinate
; COPYRIGHT:The IDL6.3 codes and algorithms in this program are to be used for
;                non-commercial purposes only. For commercial use, contact the authors.
;-

```

```

FUNCTION CORREL_FIND,correl,area,shar
  sco = SIZE(correl)          ;dimensions of CORREL
  mask = BYTARR(sco[1],sco[2]) ;create mask to allow edge-space for STATMAP
  mask[shar[0]+area[0]:sco[1]-shar[0]-area[0]-1,shar[1]+area[1]:sco[2]-shar[1]-area[1]-1] = 1
  correl = mask * correl      ;apply mask
  RETURN,ARRAY_INDICES(correl,WHERE(correl EQ MAX(correl))) ;find first maximum R value location
END

```

```

;+
; NAME:          STATMAP
; PURPOSE:       This routine cross-correlates regions of interest with a model object
;                using the Spearman Rho Rank method. It returns a map showing the
;                - log ( P-value ) of the regions and the final locations of detected events.
; INPUTS:        data:   2D array containing search space, usually normalized data
;                model:  2D array containing model object, usually a synthetic CLSM spark
;                area:   2-element array defining kernel size for Spearman Rank Correlation
;                  [0]: half WINA in x-dimension
;                  [1]: half WINA in y-dimension
;                shar:   half of shift area for centre of model object
;                  [0]: x-dimension
;                  [1]: y-dimension
;                pre:    tentative location for detected Ca2+ spark
;                  [0]: tentative x-ordinate
;                  [1]: tentative y-ordinate

```

```

; OUTPUTS:      xy:          final location for detected Ca2+ spark
;              [0]: final x-ordinate
;              [1]: final y-ordinate
; COPYRIGHT:The IDL6.3 codes and algorithms in this program are to be used for
;              non-commerical purposes only. For commerical use, contact the authors.
;-

FORWARD_FUNCTION MINP
FUNCTION STATMAP,data,model,area,shar,sigp,pre
  ssp = SIZE(model);define model kernel, ARC
  arc = model[ssp[1]/2-area[0]:ssp[1]/2+area[0]-1,ssp[2]/2-area[1]:ssp[2]/2+area[1]-1]
  ind = WHERE(arc GT MIN(model)) ;use only pixels with intensity above basal fluorescence
  arc = arc[ind]
  pmap = FLTARR(2*(area[0]+shar[0]),2*(area[1]+shar[1]),2);array to hold individual rho- and P-value maps
  pmap[*,* ,1] = 1. ;default P-value in map is 1.0
FOR xim = pre[0]-shar[0],pre[0]+shar[0]-1 DO BEGIN ;shift in X over area (defined by SHAR) around PRE
  FOR yim = pre[1]-shar[1],pre[1]+shar[1]-1 DO BEGIN ;shift in Y over area (defined by SHAR) around PRE
    aoi = data[xim-area[0]:xim+area[0]-1,yim-area[1]:yim+area[1]-1] ;define AOI in DATA
    aoi = aoi[ind] ;use IND pixels only
    pmap[xim-pre[0]+shar[0]+area[0],yim-pre[1]+shar[1]+area[1],*] = R_CORRELATE(aoi,arc) ;Spearman Rank Correlation
  ENDFOR
ENDFOR
ENDFOR
RETURN, MINP(area,shar,pmap,pre) ;find XY by locating minimum P-value
END

```

```

;+
; NAME: MINP
; PURPOSE:      This routine returns the coordinates of the center of
;              the detected object as determined by the Spearman Rank Rho Correlation,
;              used in STATMAP.
; INPUTS:      area:      2-element array defining kernel size for Spearman Rank Correlation
;              [0]: half WINA in x-dimension
;              [1]: half WINA in y-dimension
;              shar:      half of shift area for centre of model object
;              [0]: x-dimension
;              [1]: y-dimension
;              pmap:      P-value map for individual object
;              pre:      tentative location for detected Ca2+ spark
;              [0]: tentative x-ordinate
;              [1]: tentative y-ordinate
; OUTPUT:      res:      [pvalue,x,y], where
;              pvalue = minimum P-value in pmap
;              x = final x-ordinate
;              y = final y-ordinate
; COPYRIGHT:The IDL6.3 codes and algorithms in this program are to be used for
;              non-commerical purposes only. For commerical use, contact the authors.
;-

```

```

FUNCTION MINP,area,shar,pmap,pre
  pvalue = MIN(pmap[*,* ,1]) ;minimum value in PMAP[*,* ,1] is the pvalue
  locxy = ARRAY_INDICES(pmap[*,* ,1],WHERE(pmap[*,* ,1] EQ pvalue)) ;locate pvalue
IF (N_ELEMENTS(locxy) GT 2) THEN BEGIN ;if more than one pixel contains minimum take center
  locxy[0,0] = MEAN(locxy[0,*])
  locxy[1,0] = MEAN(locxy[1,*])
ENDIF
  locxy[0,0] = pre[0] - area[0] - shar[0] + locxy[0,0] ;convert coordinates from PMAP grid to DATA grid
  locxy[1,0] = pre[1] - area[1] - shar[1] + locxy[1,0]
  RETURN,[pvalue,locxy[* ,0]] ;return pvalue and coordinates
END

```

```

;+
; NAME: NEXTSP
; PURPOSE:      This routine removes a found object in the initial correlation
;              array to prepare it for subsequent object searches. Removal uses
;              the model object auto-correlation.
; INPUTS:      correl:    initial 2D FFT correlation array
;              model:     2D array holding model object
;              xy:        initial location for detected Ca2+ spark

```

```

; [0]: final x-ordinate
; [1]: final y-ordinate
; area: 2-element array defining kernel size for Spearman Rank Correlation
; [0]: half WINA in x-dimension
; [1]: half WINA in y-dimension
; OUTPUTS: correl: amended 2D FFT correlation array
; COPYRIGHT:The IDL6.3 codes and algorithms in this program are to be used for
; non-commercial purposes only. For commercial use, contact the authors.
;-

```

```

FUNCTION NEXTSP,correl,model,xy,area
  ssp = SIZE(model);dimensions of MODEL
  sco = SIZE(correl) ;dimensions of CORREL
  spmask = SMOOTH(FFTCORREL(model,/AUTO),2*area[0]/EDGE) > 0
;note autocorrelate model as term for subtraction and blur to account for differences in detected objects
  spmask = spmask * MAX(correl) / MAX(spmask) ;scale amplitude to cross-correlation
IF (sco[1] LT ssp[1]) THEN spmask = spmask[ssp[1]/2-sco[1]/2:ssp[1]/2-sco[1]/2+sco[1]-1,*] ;if x-dimension of model is > data
IF (sco[2] LT ssp[2]) THEN spmask = spmask[*,ssp[2]/2-sco[2]/2:ssp[2]/2-sco[2]/2+sco[2]-1] ;if y-dimension of model is > data
  mask = FLTARR(sco[1],sco[2]) ;create MASK array to size of CORREL
  ssp = SIZE(spmask) ;dimensions of SPMASK
  mask[sco[1]/2-ssp[1]/2:sco[1]/2-ssp[1]/2+ssp[1]-1,sco[2]/2-ssp[2]/2:sco[2]/2+ssp[2]-ssp[2]/2-1]=spmask ;fill MASK
  mask = SHIFT(mask,xy[0]-sco[1]/2-1,xy[1]-sco[2]/2-1) ;position correctly
  RETURN,correl - mask ;remove detected event
END

```

END

```

;+
; NAME: MAKESPARK_FUNC
; PURPOSE: This routine generates a synthetic CLSM Ca2+ spark in a 2D array
; INPUT: arr: 2D floating point array to hold Ca2+ spark
; p: 7-element floating point array holding initial spark parameters
; [0]: dF
; [1]: FWHM (px)
; [2]: tau rise (px)
; [3]: tau decay (px)
; [4]: model center (x-ordinate), =< array x-dimensions
; [5]: model center (y-ordinate), =< array y-dimensions
; [6]: F0
; OUTPUT: arr: 2D floating point array holding Ca2+ spark
; start: (optional) start time (px) of spark time course
; tpeak: (optional) time to peak (px)
; thalf: (optional) half-time to decay (px)
; COPYRIGHT:The IDL6.3 codes and algorithms in this program are to be used for
; non-commercial purposes only. For commercial use, contact the authors.
;-

```

```

PRO MAKESPARK_FUNC,arr,p,start,tpeak,thalf
!EXCEPT=0
  sz = SIZE(arr) ;dimensions of ARR
  y = FINDGEN(sz[2]) - P[5];generate time axis with shift
;amplitude(t) function
  ampt = EXP(-EXP(-y/P[2]))-y/P[3] ;sigmoidal rising phase and exponential decay phase
  ampt = ampt * P[0] / EXP(P[2]*(ALOG(P[2]/P[3])-1.)/P[3]);scale amplitude
  start = WHERE(ampt GE 1E-20) & start = start[0] ;find start of rise
  maxp = -P[2]*ALOG(P[2]/P[3]) + P[5] ;find location of peak
  endhalf = WHERE(ampt GE (P[0]/2.)) ;find time of half decay
  tpeak = maxp - start ;find time to peak
  thalf = endhalf[N_ELEMENTS(endhalf)-1] - maxp ;find time of half decay
;sigma(t) function
  sigma = P[1] / 2.355 ;convert FWHM to sigma
  sigmat = ((y-start+P[5])^2+0.0001)^0.25 ;sigma increases with positive and negative square root of time
  sigmat = sigmat * sigma / sigmat[maxp] ;scale sigma at peak
;fluorescence(x,t) function
  FOR i =0,sz[1]-1 DO arr[i,*] = ampt * EXP(-(i-P[4])^2/(2.*sigmat^2)) + P[6] ;create spark
END

```

```

;+
; NAME: MAKESPARK
; PURPOSE: This routine utilizes the MAKESPARK_FUNC routine to generate a
; synthetic CLSM Ca2+ spark. This adapts MAKESPARK_FUNC for its use in
;

```



```

; CURVEFIT (a 1D non-linear least squares fitting routine within the IDL
; package), also providing analytical partial derivatives.
; INPUT:      x:      1D independent variable, where
;                [0]: size of data array in x
;                [1]: size of data array in y
;                [2:x[0]+1]: independent variable x
;                [x[0]+2:*]: independent variable y
;            p:      7-element floating point array holding initial spark parameters
;                [0]: dF
;                [1]: FWHM (px)
;                [2]: tau rise (px)
;                [3]: tau decay (px)
;                [4]: model center (x-ordinate)
;                [5]: model center (y-ordinate)
;                [6]: F0
; OUTPUT:     z:      1D data array
;                pder: (optional) 2D array of partial derivatives
; COPYRIGHT:The IDL6.3 codes and algorithms in this program are to be used for
; non-commercial purposes only. For commercial use, contact the authors.
;-

PRO MAKESPARK,x,p,z,pder
    nx = LONG(x[0]) & ny = LONG(x[1])          ;data size in x- and y-dimensions
    n = nx * ny                                ;no. elements in dataset
    z = FLTARR(nx,ny)                          ;create empty array for spark

MAKESPARK_FUNC,z,p,start
;call spark routine
    z = REFORM(z,n,/OVERWRITE)                ;2D to 1D spark
IF (N_PARAMS() GE 4) THEN BEGIN              ;partial derivatives
    xp = (x[2:nx+1]) # REPLICATE(1,ny)       ;x independent variables
    yp = REPLICATE(1,nx) # (x[nx+2:*])       ;y independent variables
    a = P[0] / EXP( (P[2]/P[3]) * (ALOG(P[2]/P[3])-1.) )
    b = EXP(-(yp - P[5])/P[2])
    c = (yp-P[5])/P[3]
    d1 = P[2] * ALOG(P[3]/P[2]) + P[5] - start
    d2 = (xp-P[4])/P[1]
    d = 0.5 * d2^2 * (2.355*(d1^2+0.0001)^0.25/((yp-start)^2+0.0001)^0.25)^2
    e = EXP(-b-c-d)
    pder[* ,0] = a*e / P[0]
    pder[* ,1] = a*e*2.*d/P[1]
    pder[* ,2] = -a*e*((ALOG(P[2]/P[3])-1.)/P[3]+(1/P[3]))+((yp-P[5])*b/P[2]^2+0.5*((d2*2.355)^2*d1* $
(ALOG(P[3]/P[2])-1.)/((d1^2+0.0001)^0.5*((yp-start)^2+0.0001)^0.5) ))
    pder[* ,3] = -a*e*((-P[2]*(ALOG(P[2]/P[3])-1.)/P[3]^2 - P[2]/P[3]^2)-(c/P[3]-0.5*(d2*2.355)^2*d1* $
P[2]/(P[3]*((d1^2+0.0001)^0.5*((yp-start)^2+0.0001)^0.5))))
    pder[* ,4] = a*e*(xp-P[4])/((P[1]*((yp-start)^2+0.0001)^0.25/(2.355*((P[2]*ALOG(P[3]/P[2])+P[5]-start)^2+0.0001)^0.25))^2
    pder[* ,5] = a*((-b/P[2])+1/P[3]-d)*e
    pder[* ,6] = 1.
ENDIF
END

;+
; NAME:      ANALYZESPARK
; PURPOSE:   This routine fits parameters of Ca2+ spark using defined model/function by calling CURVEFIT and estimating
;            initial parameters with those used for finding sparks in FINDOBJECT and with locations
;            output from FINDOBJECT.
; INPUT: data:      data array
;                mfdares: array holding output of MFDA, with length of second dimension equal to number
;                of detected events (unless no sparks are detected)
;                [0]: pvalue
;                [1]: x-ordinate
;                [2]: y-ordinate
;            p:      initial parameters for fit
;                [0]: dF
;                [1]: FWHM at peak (px)
;                [2]: decay time constant (px)
; OUTPUT:     parmfit: fitted parameters of a spark
;                [0]: dF
;                [1]: FWHM at peak (px)
;                [2]: rise time constant (px)

```

```

;           [3]: decay time constant (px)
;           [4]: spark x-ordinate
;           [5]: spark y-ordinate
;           [6]: F0
; refined: optional output of 2D refined model array with fitted parameters
; chi:      status of curvefit, 0=success, 1=failed as Chi-square increased without bounds, 2=failed to converge in max. iterations
; COPYRIGHT: The IDL6.3 codes and algorithms in this program are to be used for non-commercial purposes only. For commercial use, contact the authors.
;-

```

```
PRO ANALYZESPARK,data,mfdares,detected,p,parmfir,refined,chi
```

```
;ORGANISE DATA FOR CURVE-FITTING
```

```

szda = SIZE(data)           ;DATA dimensions
p = ABS(p)                  ;ensure no negative values
nx = (4. * FIX(P[1])) < (szda[2]/4 - 1) ;fit includes data within 4 times expected FWHM
ny = (4. * FIX(P[2]) + 20) < (szda[2]/4 - 1) ;fit includes data 20 px prior to detected location to 4 times expected half decay
n = nx * ny                  ;size of dataset to be fitted
savg = FLTARR(nx,ny)
count = 0
FOR i=0,detected-1 DO BEGIN
  temp_x = mfdares[1,i] & temp_y = mfdares[2,i]
  IF (temp_x GT nx) AND (temp_y GT ny) AND (temp_x LT (szda[1]-nx)) AND (temp_y LT (szda[2]-ny)) THEN BEGIN ;events too close to edge
    temp = SHIFT(data,szda[1]/2-mfdares[1,i],20-mfdares[2,i]) ;centering detected objects in savg
    IF (count EQ 0) THEN savg = temp[szda[1]/2-nx/2:szda[1]/2+nx-nx/2-1,0:ny-1] ELSE $
      savg = [[savg],[[temp[szda[1]/2-nx/2:szda[1]/2+nx-nx/2-1,0:ny-1]]] ;cut out region of interest as defined by nx and ny
    count += 1
  ENDIF
ENDFOR
savg = REBIN(savg,nx,ny,1) ;signal average all detected objects

```

```
;CURVE-FITTING
```

```

x = FINDGEN(nx) & y = FINDGEN(ny) ;generate independent variables
parm = [P[0],P[1],0.1*P[2],P[2],nx/2,20,MEAN(data)] ;initial parameter estimates
result = CURVEFIT([nx,ny,x,y],REFORM(savg,n),weight,parm,FUNCTION_NAME="MAKESPARK",STATUS=chi) ;fitting with no weighting
parmfir = [parm[0],parm[1],parm[2],parm[3],szda[1]/2,szda[2]/2,parm[6]] ;fitted parameters in parmfir

```

```
IF (parm[0] LT 0) OR (parm[1] LT 0) OR (parm[2] LT 0) OR (parm[3] LT 0) OR (parm[4] LT 0) OR (parm[5] LT 0) OR (parm[6] LT 0) THEN BEGIN
```

```

  chi = 1 ;negative numbers as unsuccessful fit
  refined = INTARR(szda[1],szda[2])
ENDIF ELSE BEGIN

```

```
;GENERATE REFINED MODEL
```

```

refined = FLTARR(szda[1],szda[2]) ;create array for refined model
MAKESPARK_FUNC,refined,parmfir ;generate model and print time course characteristics

```

```
ENDEELSE
```

```
END
```

```
;
```

```
; NAME: MAKEGAUSS2D_FUNC
```

```

; PURPOSE: This routine generates a 2D Gaussian in a 2D array
; INPUT:   array: 2D floating point array to hold 2D Gaussian
;          p:      6-element floating point array holding initial 2D Gaussian parameters
;

```

```

;           [0]: dF
;           [1]: FWHM in x (px)
;           [2]: FWHM in y (px)
;           [3]: model center (x-ordinate), =< array x-dimensions
;           [4]: model center (y-ordinate), =< array y-dimensions
;           [5]: F0

```

```
; OUTPUT: array: 2D floating point array holding Ca2+ spark
```

```

; COPYRIGHT:The IDL6.3 codes and algorithms in this program are to be used for
; non-commercial purposes only. For commercial use, contact the authors.
;-

```

```
PRO MAKEGAUSS2D_FUNC,array,p
```

```

sz = SIZE(array)           ;find dimensions of array
nx = LONG(sz[1])           ;x-dimension
ny = LONG(sz[2])           ;y-dimension
MAKEGAUSS2D,[nx,ny,FINDGEN(nx),FINDGEN(ny)],p,z ;call 2D Gaussian function (requires 1D index)
array = REFORM(z,nx,ny) ;reform array to 2D

```

```
END
```

```

;+
; NAME: MAKEGAUSS2D
; PURPOSE: This routine utilizes the MAKEGAUSS2D_FUNC routine to generate a
;          2D Gaussian. This provides analytical partial derivatives and can be used with
;          CURVEFIT (a 1D non-linear least squares fitting routine within the IDL
;          package).
; INPUT:   x:      1D independent variable, where
;                [0]: size of data array in x
;                [1]: size of data array in y
;                [2:x[0]+1]: independent variable x
;                [x[0]+2:*]: independent variable y
;          p:      6-element floating point array holding initial 2D Gaussian parameters
;                [0]: dF
;                [1]: FWHM in x (px)
;                [2]: FWHM in y (px)
;                [3]: model center (x-ordinate)
;                [4]: model center (y-ordinate)
;                [5]: F0
; OUTPUT:  z:      1D data array
;                pder: optional 2D array of partial derivatives
; REFERENCE: Modified from IDL6.3 GAUSS2DFIT routine.
;-

PRO MAKEGAUSS2D,x,p,z,pder
  nx = LONG(X[0]) & ny = LONG(X[1]) ;x- and y-dimensions
  xp = (X[2:nx+1]-p[3]) # REPLICATE(1.0/P[1],ny) ;expand X values
  yp = REPLICATE(1.0/P[2],nx) # (x[nx+2:*]-P[4]) ;expand Y values
  n = nx * ny ;total number of elements
  u = REFORM(EXP(-0.5 * (xp^2 + yp^2)),n) ;make exp() term 1D
  z = P[5] + P[0] * u
IF (N_PARAMS() GE 4) THEN BEGIN ;partial derivatives
  s = 0.0 & c = 1.0
  pder = FLTARR(n,N_ELEMENTS(P))
  pder[* ,0] = u
  u = P[0] * u ;common term
  pder[* ,1] = u * xp^2 / P[1]
  pder[* ,2] = u * yp^2 / P[2]
  pder[* ,3] = u * (c/P[1] * xp + s/P[2] * yp)
  pder[* ,4] = u * (-s/P[1] * xp + c/P[2] * yp)
  pder[* ,5] = 1.0
ENDIF
END

;+
; NAME: ANALYZEGAUSS
; PURPOSE: This routine fits parameters of a 2D Gaussian using defined model/function by calling CURVEFIT and estimating
;          initial parameters with those used for finding sparks in FINDOBJECT and with locations
;          output from FINDOBJECT.
; INPUT: data: data array
;          mfdares: array holding output of MFDA, with length of second dimension equal to number
;                  of detected events (unless no sparks are detected)
;          [0]: pvalue
;          [1]: x-ordinate
;          [2]: y-ordinate
;          p: initial parameters for fit
;          [0]: dF
;          [1]: FWHM in x (px)
;          [2]: FWHM in y (px)
; OUTPUT: parmfit: fitted parameters of a spark
;          [0]: dF
;          [1]: FWHM in x (px)
;          [2]: FWHM in y (px)
;          [3]: object x-ordinate
;          [4]: object y-ordinate
;          [5]: F0
;          refined: optional output of 2D refined model array with fitted parameters
;          chi: status of curvefit, 0=success, 1=failed as Chi-square increased without bounds, 2=failed to converge in max. iterations
; COPYRIGHT: The IDL6.3 codes and algorithms in this program are to be used for non-commercial purposes only. For commercial use, contact the authors.
;-

```

```
PRO ANALYZEGAUSS,data,mfdares,detected,p,parmfir,refined,chi
```

```
;ORGANISE DATA FOR CURVE-FITTING
szda = SIZE(data) ;data dimensions
p = ABS(p) ;ensure no negative values
nx = ROUND(6. * P[1] + 0.5) < (szda[1]/4 - 1) ;fit area includes 6 times estimated FWHMx
ny = ROUND(6. * P[2] + 0.5) < (szda[2]/4 - 1);fit area includes 6 times estimated FWHMy
n = nx * ny ;total number of elements
count = 0
savg = FLTARR(nx,ny)
FOR i=0,detected-1 DO BEGIN
  temp_x = mfdares[1,i] & temp_y = mfdares[2,i]
  IF (temp_x GT nx) AND (temp_y GT ny) AND (temp_x LT (szda[1]-nx)) AND (temp_y LT (szda[2]-ny)) THEN BEGIN ;events too close to edge
    temp = SHIFT(data,szda[1]/2-mfdares[1,i],szda[2]/2-mfdares[2,i]) ;centering detected objects in savg
    IF (count EQ 0) THEN savg = temp[szda[1]/2-nx/2:szda[1]/2+nx-nx/2-1,szda[2]/2-ny/2:szda[2]/2+ny-ny/2-1] ELSE $
    savg = [[savg]],[[temp[szda[1]/2-nx/2:szda[1]/2+nx-nx/2-1,szda[2]/2-ny/2:szda[2]/2+ny-ny/2-1]]]
    count += 1
  ENDIF
ENDFOR
savg = REBIN(savg,nx,ny,1) ;signal average all detected objects

;CURVE-FITTING
x = FINDGEN(nx) & y = FINDGEN(ny) ;generate independent variables
parm = [P[0],P[1],P[2],nx/2,ny/2,MEAN(data)] ;initial parameter estimates
result = CURVEFIT([nx,ny,x,y],REFORM(savg,n),weight,parm,function_name="MAKEGAUSS2D",STATUS=chi) ;fitting with no weighting
parmfir = [parm[0],parm[1],parm[2],szda[1]/2,szda[2]/2,parm[5]] ;fitted parameters in parmfir

IF (parm[0] LT 0) OR (parm[1] LT 0) OR (parm[2] LT 0) OR (parm[3] LT 0) OR (parm[4] LT 0) OR (parm[5] LT 0) THEN BEGIN
  chi = 1 ;negative parameters as unsuccessful fit
  refined = INTARR(szda[1],szda[2])
ENDIF ELSE BEGIN
;GENERATE REFINED MODEL
  refined = FLTARR(szda[1],szda[2]) ;create array for refined model
  MAKEGAUSS2D_FUNC,refined,parmfir ;generate model and print time course characteristics
ENDELSE
END
```
